# Supplementary material
Source: publisher figshare collection journal article supplement (https://springernature.figshare.com/ndownloader/files/18094610)

# Supplementary Figure 5

## Total Recovery of Secondary Driver Peak

### Arbitrated Peel-off

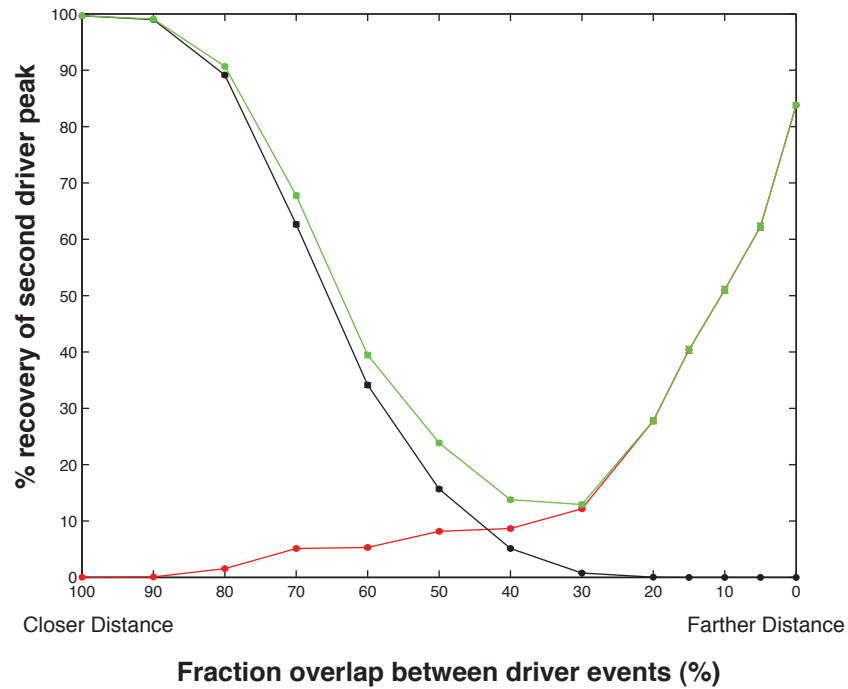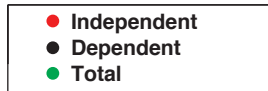

### Standard Peel-off

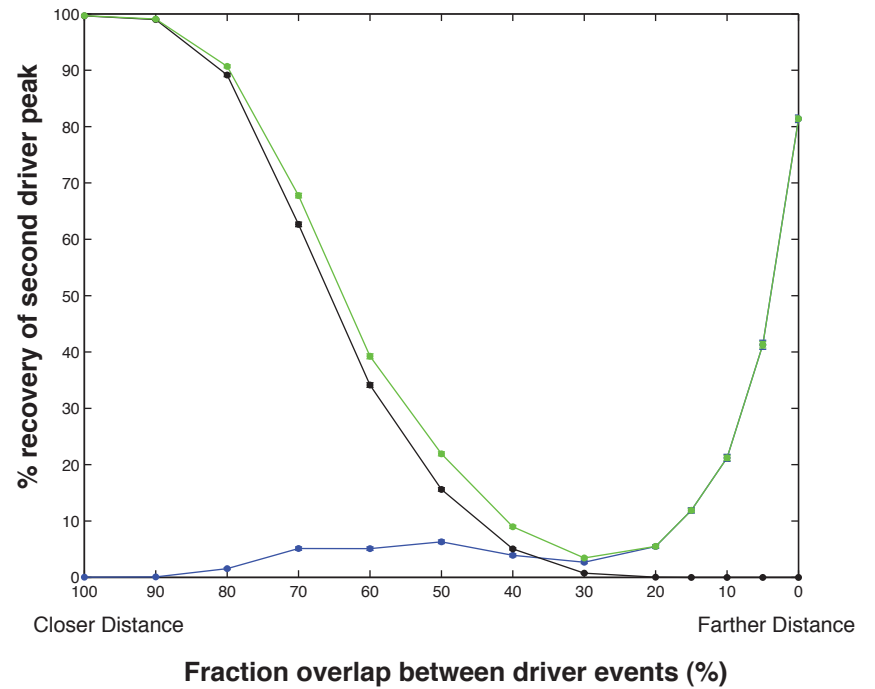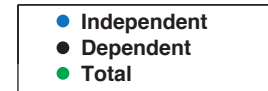

Supplement: Supplementary file [file 18094610]
